# Supplementary material for: Nucleoid remodeling during environmental adaptation is regulated by HU-dependent DNA bundling
Source: PubMed Central journal article supplement (PMC7283360; doi:10.1038/s41467-020-16724-5), 2020-06-09
Supplement: 41467_2020_16724_MOESM1_ESM.pdf [file 41467_2020_16724_MOESM1_ESM.pdf]

Supplementary information

**Nucleoid remodeling during environmental adaptation is regulated by HU dependent DNA bundling**

Remesh S.G., Verma S. *et al*

This PDF file contains: -

- Supplementary Figures 1-5
- Supplementary Table 1, 2, 3

Supplementary Figure 1

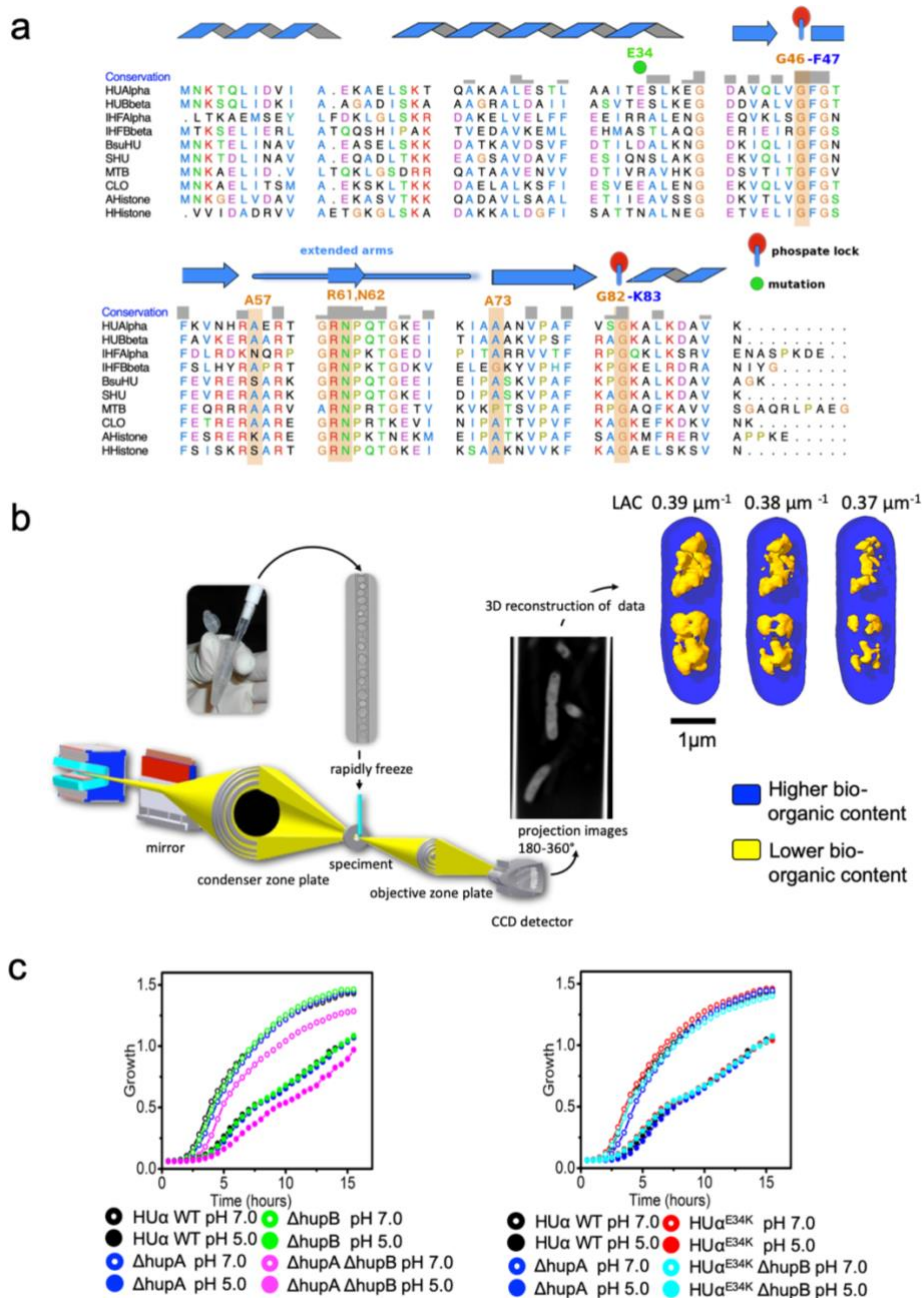

**Supplementary Figure 1. Sequence alignment of prokaryotic HU/IHF family members, Soft X-ray tomography based near-native imaging of *E. coli* WT and mutant strains and their growth curves.** (a) Sequence alignment of prokaryotic HU/IHF family members is shown here. Residues Gly46, Gly82 and residues in the extended arms – Arg61 and Asn62 (orange box) are strictly conserved across the different HU family members. Residues Gly46 and Gly82 (red dot) of HU $\alpha$  are critical in forming the phosphate lock with native dsDNA. Residue Lys83 involved in protein-dsDNA interaction is also shown (blue). Position of the point mutation (E34K) are marked with a green dot. Secondary structure elements are shown above the sequence. HUAlpha: *E. coli* HU  $\alpha$ -chain; HUBeta: *E. coli* HU  $\beta$ -chain; IHFAalpha: *E. coli*  $\alpha$ -chain; IHFBeta: *E. coli* IHF

$\beta$ -chain; BsuHU: *Bacillus subtilis* HU; SHU: *Staphylococcus aureus* HU; MTB: *Mycobacterium tuberculosis* HU; CLO: *Clostridium saccharolyticum*; AHistone *Anabaena cylindrica* HU; HHistone: *Halorubrum aidingense* HU **(b)** Schematic of the optical layout of the soft X-ray microscope XM-2 at beamline 2.1 at the Advanced Light Source (ALS) at Lawrence Berkeley National lab (adapted from LeGros et al., 2015). A low-field (1.3 T) bend-magnet source at ALS provides the soft X-ray with peak brightness over the important ‘water window’ wavelength range. The flat mirror acts to cut-off high-energy photons. Fresnel zone plate condenser lens in combination with a central beam stop and a pinhole acts as a linear zone plate monochromator. The specimen is loaded into pre-cut glass capillaries, rapidly frozen using an in-house rapid freezing equipment and transferred to a cryogenic specimen rotation stage for tomographic data collection. Another Fresnel zone plate objective lens transmits a magnified image of the illuminated specimen onto the CCD (charge-coupled device) detector. The projection images collected around a rotation axis in 2° increments are normalized, aligned and tomographic reconstructions calculated using iterative reconstruction methods. Representative 3D reconstructions of an *E. coli* cell segmented at different LAC values are shown. The macrodomain architecture is maintained across the different LAC values though the exact boundaries of individual macrodomains are indeterminate **(c)** Growth curve for *E. coli* WT strain (with functional *hupA* and *hupB*, SCV96) and mutant strains SCV18 (with no functional *hupA*), SCV19 (with no functional *hupB*), SCV27 (with no functional *hupA* or *hupB*), SCV56 (*hupAE34K* with functional *hupB*) and SCV85 (*hupAE34K* with no functional *hupB*) at either pH 7.0 or pH 5.0.

Supplementary Figure 2

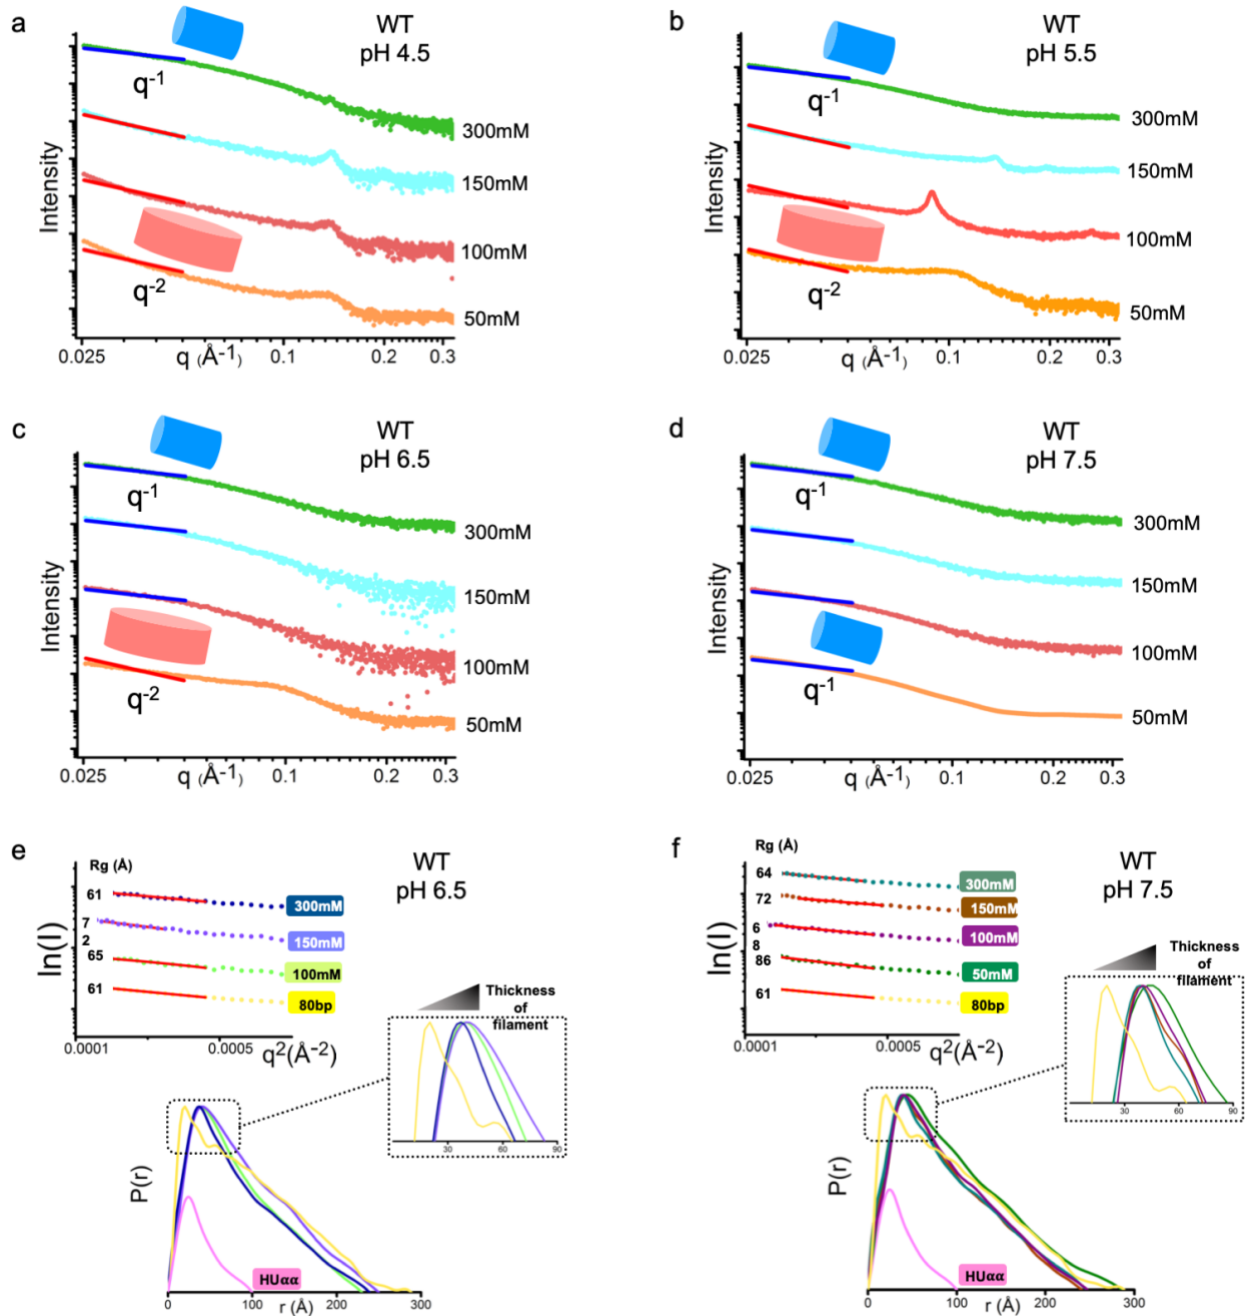

**Supplementary Figure 2. Double logarithmic representation of experimental SAXS profiles.**

(a-d) Double logarithmic representation of experimental SAXS profiles for HU $\alpha$  in complex with 80bp DNA measured at different pH and increasing salt concentrations are shown (a) At pH 4.5, the low  $q$  region of curves between salt concentrations 50-150 mM NaCl match to the reference line (red) for lamellar structures ( $I \propto q^{-2}$ ) while the curve at high salt concentration (300 mM NaCl) matches the reference line (blue) for tubular/filament-like structures ( $I \propto q^{-1}$ ) (b) At pH 5.5, the low  $q$  region of curves between salt concentrations 50 -100 mM NaCl match to the reference line (red) for lamellar structures ( $I \propto q^{-2}$ ) while the curves at higher salt concentration

(150 – 300 mM NaCl) match the reference line (blue) for tubular/filament-like structures ( $I \propto q^{-1}$ ) (c) At pH 6.5, the low  $q$  region of curve for salt concentrations 50 mM NaCl match to the reference line (red) for lamellar structures ( $I \propto q^{-2}$ ) while curves at higher salt concentration (100 – 300 mM NaCl) match the reference line (blue) for tubular/filament-like structures ( $I \propto q^{-1}$ ) (d) At pH 7.5, the low  $q$  region of curve for all the curves match the reference line (blue) for tubular/filament-like structures ( $I \propto q^{-1}$ ) (e-f) Guinier regions for the experimental SAXS curves for HU $\alpha\alpha$  in complex with 80bp DNA measured at pH 6.5 and pH 7.5 and increasing salt concentration are also shown and are color coded as indicated. (**upper panels**) Linearity in the Guinier region with the limits  $qxR_g < 1.3$  (red line) indicates persistence of long filaments and absence of aggregation for protein/DNA complexes at pH 6.5 and pH 7.5. The corresponding pair distribution function normalized to particle volume for protein/DNA complexes at pH 6.5 and pH 7.5 (**lower panels**) indicates that thickness of the filament decreases with increasing salt concentration.  $P(r)$  functions also show maximal dimension of the protein/DNA complexes between 250-290Å.

Supplementary Figure 3

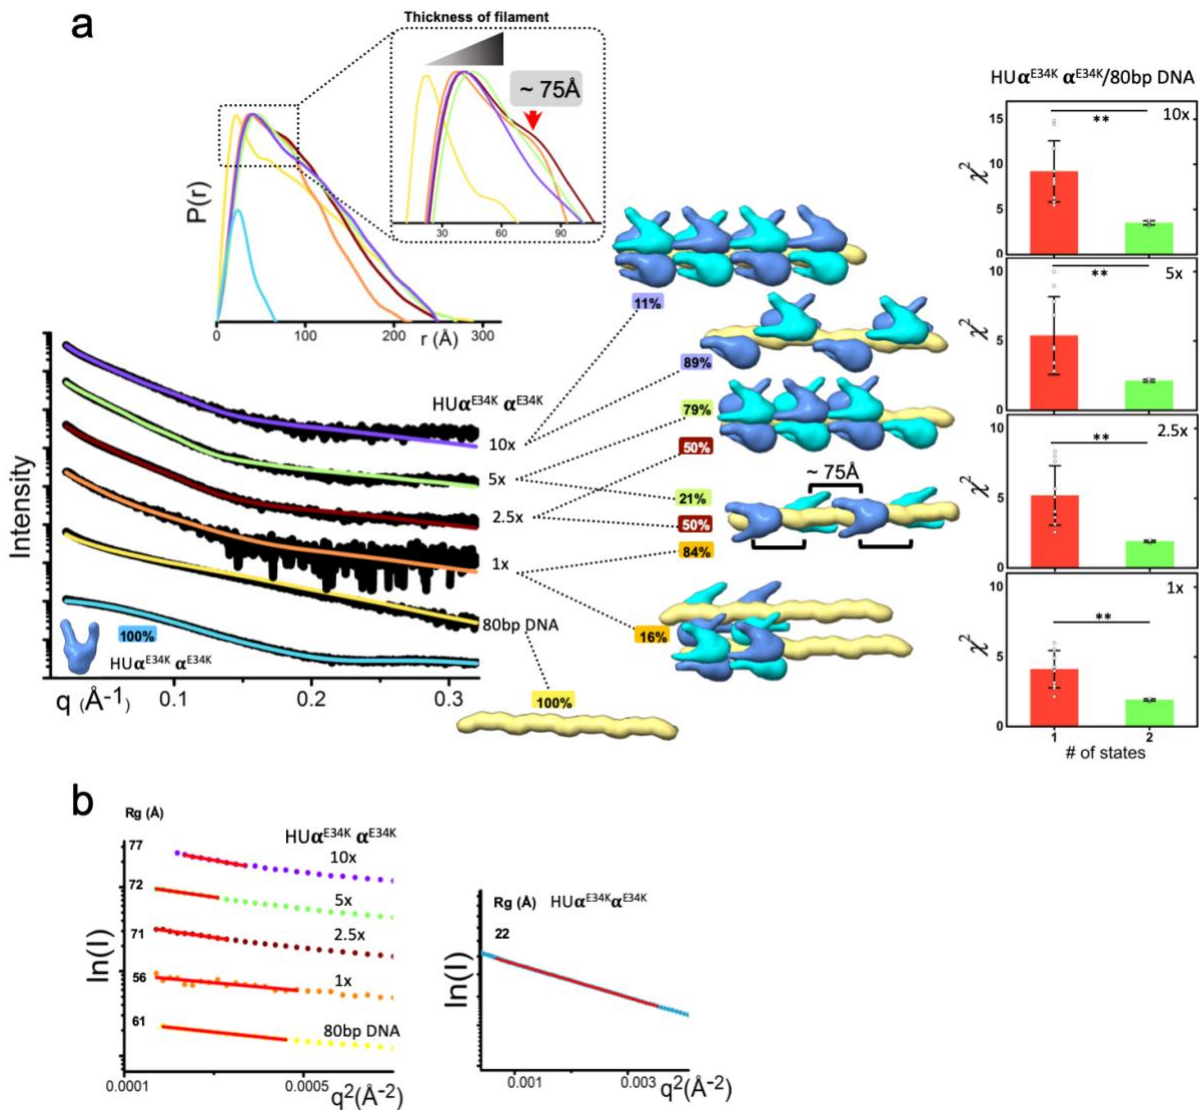

**Supplementary Figure 3. HU $\alpha$  mutation and its effects on HU $\alpha$ -DNA assembly.** (a) Experimental SAXS curves for mutant HU $\alpha^{E34K}\alpha^{E34K}$  and HU $\alpha^{E34K}\alpha^{E34K}$  in complex with 80bp DNA measured at DNA:HU $\alpha^{E34K}\alpha^{E34K}$  molar ratio of 1:1 (SASDFR6) <https://www.sasbdb.org/data/SASDFR6/>, 1:2.5 (SASDFS6) <https://www.sasbdb.org/data/SASDFS6/>, 1:5 (SASDFT6) <https://www.sasbdb.org/data/SASDFT6/> and 1:10 (SASDFU6) <https://www.sasbdb.org/data/SASDFU6/> match theoretical SAXS profiles of atomistic models ( $\chi^2$  - 1.8, 1.7, 1.9 and 3.0, respectively). Right panel shows the difference in  $\chi^2$  comparing the top 10 single-state and multi-state ensemble ( $\chi^2$  data are presented as mean values +/- SD determined from  $n = 10$  independent models for each protein:DNA ratio. The data points are shown as black open circles. Statistical significance was assessed using a two-sided two-sample t-test. All differences between means with  $p < 0.01$  are indicated by \*\*). The models were created using multiple asymmetric units of the crystal structure of HU $\alpha^{E34K}\alpha^{E34K}$  - DNA to generate

an HU $\alpha$ E34K $\alpha$ E34K - 80bp DNA nucleoprotein assembly. The models were fit using FoXS/Multi-FoXS. The models are displayed as low-resolution molecular surfaces. Pair distribution (P(r)) functions were calculated from the corresponding SAXS curves and normalized based on experimentally determined volumes of assemblies. The peak around 75Å (inset) corresponds to the protein-protein distance as indicated for DNA:HU $\alpha$ E34K $\alpha$ E34K molar ratio of 1:2.5. With increasing protein concentration the DNA is covered with more protein molecules. **(b)** Guinier regions for the experimental SAXS curves for HU $\alpha$ E34K $\alpha$ E34K and HU $\alpha$ E34K $\alpha$ E34K in complex with 80bp DNA at DNA:HU $\alpha$ E34K $\alpha$ E34K molar ratio of 1:1, 1:2.5, 1:5 and 1:10 are shown and are color coded as indicated. Linearity in the Guinier region with the limits  $q \cdot R_g < 1.3$  (red line) indicates persistence of long filaments and absence of aggregation in the sample.

Supplementary Figure 4

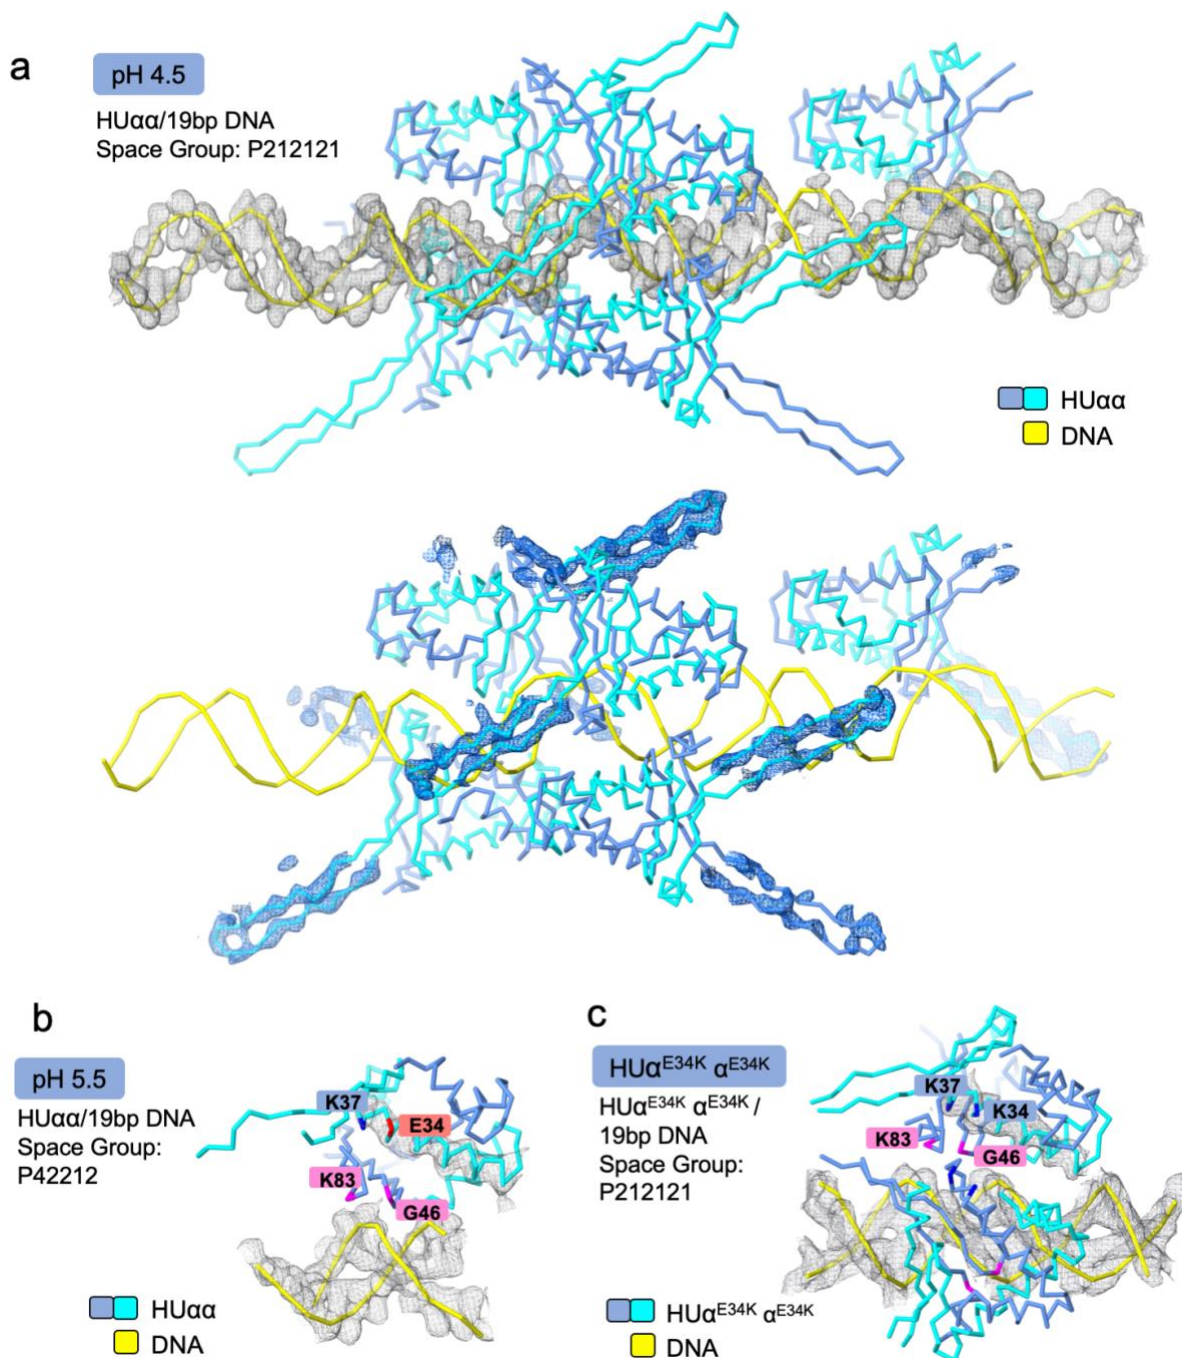

**Supplementary Figure 4. Asymmetric unit (ASU) of three protein/DNA complexes.** Asymmetric unit (ASU) of three protein/DNA complexes showing 2Fo-Fc electron density map contoured at  $\sigma=1.0$  for selected regions. **(a)** HU $\alpha$ -DNA structure at pH 4.5 - **upper panel** – The continuous density for DNA (gray mesh) is shown **lower panel** – Clear density map for arms region of HU $\alpha$  (residues His54 – Asn75) for 3 molecules in the ASU is shown **(b)** HU $\alpha$ -DNA at pH 5.5 - Density map for the DNA and selected region Lys18 - Glu38 (gray mesh) is shown **c.** HU $\alpha^{E34K}$ -DNA density map for the DNA and selected region Lys18 - Glu38 (gray mesh) is shown



Supplementary Figure 5

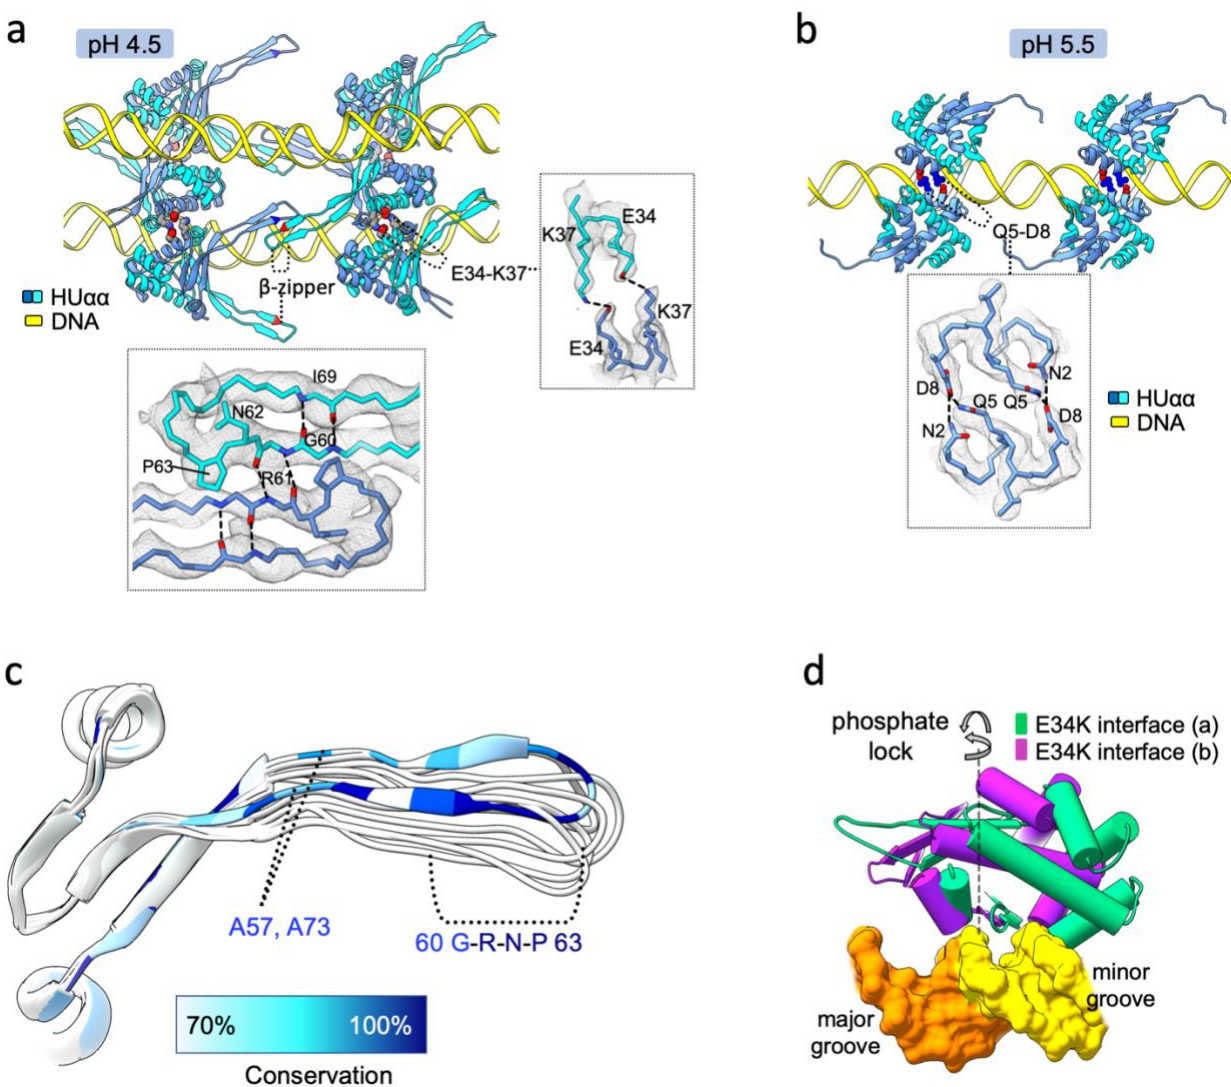

**Supplementary Figure 5. HU $\alpha$ -DNA complexes and role of HU $\alpha$  residues.** (a) Combining different ASU of HU $\alpha$ -DNA structure at pH 4.5 shows two regions critical for protein-protein interaction. Well-defined electron density of E34 and K37 residues is shown that highlights the intermolecular hydrogen bonds coupling two HU $\alpha$  dimers. In addition, at low pH, arms of the HU $\alpha$  dimer bridge oppositely facing dimers located on the adjacent DNA strands through intermolecular backbone hydrogen bonds between highly conserved residues R61 and N62 (b) HU $\alpha$ -DNA structure at pH 5.5 shows no arms coupling or interaction via E34 and K37 hydrogen bonds. Intermolecular hydrogen bonds through residues Gln5 and Asp8 create an alternative coupling of HU $\alpha$  dimers (c) The flexibility of the HU $\alpha$  arms region results in several non-superimposable HU $\alpha$  arms. Six HU $\alpha$ s from one unit cell of the HU $\alpha$ -DNA, pH 4.5 crystal structure are superimposed and colored by the level of sequence conservations described in the Supplementary Figure 1a. (d) The two interfaces between HU $\alpha$ E34K and DNA in the crystal structure of HU $\alpha$ E34K-DNA are overlaid on the DNA to show the ball-socket joint around the DNA minor groove similar to wild type HU $\alpha$  (see Figure 5c).

**Supplementary Table 1. X-ray Diffraction data collection and refinement statistics (for Figure 5 and Supplementary Figure 4, 5)**

| (PDB ID)                                | HU $\alpha\alpha$ - DNA pH 4.5<br>(6O8Q) | HU $\alpha\alpha$ - DNA pH 5.5<br>(6O6K) | HU $\alpha\text{E34K}\alpha\text{E34K}$ - DNA<br>(6OAJ) |
|-----------------------------------------|------------------------------------------|------------------------------------------|---------------------------------------------------------|
| <b>Data collection</b>                  |                                          |                                          |                                                         |
| Space Group                             | P212121                                  | P42212                                   | P212121                                                 |
| Cell Dimensions<br>a, b, c (Å)          | 59.41, 61.15, 351.20                     | 84.79, 84.79, 63.33                      | 64.60, 86.35, 91.69                                     |
| $\alpha, \beta, \gamma$ (°)             | 90, 90, 90                               | 90, 90, 90                               | 90, 90, 90                                              |
| Resolution range (Å)                    | 50.18- 3.21<br>(3.33-3.21)               | 59.96-3.60<br>(3.73-3.60)                | 40.49- 4.09<br>(4.24- 4.09)                             |
| R <sub>meas</sub>                       | 0.1852 (1.444)                           | 0.08385 (0.6364)                         | 0.1316 (2.129)                                          |
| R <sub>pim</sub>                        | 0.0531 (0.3944)                          | 0.01722 (0.1253)                         | 0.05499 (0.8626)                                        |
| I/ $\sigma$                             | 11.31(1.61)                              | 33.10 (6.57)                             | 7.28 (1.01)                                             |
| Redundancy                              | 12.3 (13.1)                              | 24.2 (25.5)                              | 6.2 (6.0)                                               |
| Number of unique reflections            | 20,484 (1608)                            | 2939 (286)                               | 4331 (407)                                              |
| Completeness (%)                        | 93.91 (73.05)                            | 99.90 (100.00)                           | 99.29 (98.54)                                           |
| Wilson B-factor                         | 88.11                                    | 118.71                                   | 209.21                                                  |
| CC <sub>1/2</sub>                       | 0.999 (0.83)                             | 1.000 (0.959)                            | 0.996 (0.479)                                           |
| <b>Refinement statistics</b>            |                                          |                                          |                                                         |
| Number of reflections (F>0)             | 20461 (1545)                             | 2937 (286)                               | 4318 (406)                                              |
| Maximum resolution (Å)                  | 3.21                                     | 3.60                                     | 4.09                                                    |
| R <sub>work</sub>                       | 0.3066 (0.3883)                          | 0.2609 (0.3320)                          | 0.3260 (0.4029)                                         |
| R <sub>free</sub>                       | 0.3303 (0.4106)                          | 0.3133 (0.4568)                          | 0.3312 (0.5085)                                         |
| <b>Number of atoms</b>                  | 8361                                     | 1474                                     | 2993                                                    |
| Protein                                 | 7748                                     | 1328                                     | 2696                                                    |
| DNA                                     | 847                                      | 146                                      | 297                                                     |
| Solvent molecules (waters)              | -                                        | -                                        | -                                                       |
| <b>Ramachandran statistics (%)</b>      |                                          |                                          |                                                         |
| Favored                                 | 95.73                                    | 97.83                                    | 94.66                                                   |
| Allowed                                 | 4.15                                     | 2.17                                     | 5.34                                                    |
| Outliers                                | 0.12                                     | 0.0                                      | 0.0                                                     |
| <b>R.m.s.d. from ideal geometry</b>     |                                          |                                          |                                                         |
| Bond length (Å)                         | 0.006                                    | 0.005                                    | 0.005                                                   |
| Bond angles (°)                         | 0.93                                     | 0.86                                     | 1.02                                                    |
| <b>Average B values (Å<sup>2</sup>)</b> |                                          |                                          |                                                         |
| Protein                                 | 83.74                                    | 133.24                                   | 90.88                                                   |
| Water molecules                         | -                                        | -                                        | -                                                       |
| <b>Number of TLS groups</b>             | -                                        | 9                                        | -                                                       |

A single crystal was used for refinement  
 \*Number in parenthesis refer to highest resolution shell

|                                                                   | HUαα                                                                                              | 80bp DNA                                                                                          | HUαα/ 80bp pH 4.5 50mM                                                                            | HUαα/ 80bp pH 4.5 100mM                                                                           | HUαα/ 80bp pH 4.5 150mM                                                                           | HUαα/ 80bp pH 4.5 300mM                                                                           | HUαα/ 80bp pH 5.5 50mM                                                                            | HUαα/ 80bp pH 5.5 100mM                                                                           | HUαα/ 80bp pH 5.5 150mM                                                                           | HUαα/ 80bp pH 5.5 300mM                                                                           | HUαα/ 80bp pH 6.5 50mM                                                                            | HUαα/ 80bp pH 6.5 100mM                                                                           | HUαα/ 80bp pH 6.5 150mM                                                                           | HUαα/ 80bp pH 6.5 300mM                                                                           | HUαα/ 80bp pH 7.5 50mM                                                                            | HUαα/ 80bp pH 7.5 100mM                                                                           | HUαα/ 80bp pH 7.5 150mM                                                                           | HUαα/ 80bp pH 7.5 300mM                                                                           | HUααααα ααααα                                                                                     | HUααααα ααααα/ 80bp DNA pH 4.5                                                                    | HUααααα ααααα/ 80bp DNA pH 5.5                                                                    | HUααααα ααααα/ 80bp DNA pH 6.5                                                                    | HUααααα ααααα/ 80bp DNA pH 7.5                                                                    |  |
|-------------------------------------------------------------------|---------------------------------------------------------------------------------------------------|---------------------------------------------------------------------------------------------------|---------------------------------------------------------------------------------------------------|---------------------------------------------------------------------------------------------------|---------------------------------------------------------------------------------------------------|---------------------------------------------------------------------------------------------------|---------------------------------------------------------------------------------------------------|---------------------------------------------------------------------------------------------------|---------------------------------------------------------------------------------------------------|---------------------------------------------------------------------------------------------------|---------------------------------------------------------------------------------------------------|---------------------------------------------------------------------------------------------------|---------------------------------------------------------------------------------------------------|---------------------------------------------------------------------------------------------------|---------------------------------------------------------------------------------------------------|---------------------------------------------------------------------------------------------------|---------------------------------------------------------------------------------------------------|---------------------------------------------------------------------------------------------------|---------------------------------------------------------------------------------------------------|---------------------------------------------------------------------------------------------------|---------------------------------------------------------------------------------------------------|---------------------------------------------------------------------------------------------------|---------------------------------------------------------------------------------------------------|--|
| <b>SASBDB ID</b>                                                  | SASD FN6<br><a href="https://www.sasdb.org/data/SASDFN6/">https://www.sasdb.org/data/SASDFN6/</a> | SASD FP6<br><a href="https://www.sasdb.org/data/SASDFP6/">https://www.sasdb.org/data/SASDFP6/</a> | SASD F36<br><a href="https://www.sasdb.org/data/SASDF36/">https://www.sasdb.org/data/SASDF36/</a> | SASD F46<br><a href="https://www.sasdb.org/data/SASDF46/">https://www.sasdb.org/data/SASDF46/</a> | SASD F56<br><a href="https://www.sasdb.org/data/SASDF56/">https://www.sasdb.org/data/SASDF56/</a> | SASD F66<br><a href="https://www.sasdb.org/data/SASDF66/">https://www.sasdb.org/data/SASDF66/</a> | SASD FX5<br><a href="https://www.sasdb.org/data/SASDFX5/">https://www.sasdb.org/data/SASDFX5/</a> | SASD FY5<br><a href="https://www.sasdb.org/data/SASDFY5/">https://www.sasdb.org/data/SASDFY5/</a> | SASD FZ5<br><a href="https://www.sasdb.org/data/SASDFZ5/">https://www.sasdb.org/data/SASDFZ5/</a> | SASD F26<br><a href="https://www.sasdb.org/data/SASDF26/">https://www.sasdb.org/data/SASDF26/</a> | SASD FT5<br><a href="https://www.sasdb.org/data/SASDFT5/">https://www.sasdb.org/data/SASDFT5/</a> | SASD FU5<br><a href="https://www.sasdb.org/data/SASDFU5/">https://www.sasdb.org/data/SASDFU5/</a> | SASD FV5<br><a href="https://www.sasdb.org/data/SASDFV5/">https://www.sasdb.org/data/SASDFV5/</a> | SASD FW5<br><a href="https://www.sasdb.org/data/SASDFW5/">https://www.sasdb.org/data/SASDFW5/</a> | SASD FP5<br><a href="https://www.sasdb.org/data/SASDFP5/">https://www.sasdb.org/data/SASDFP5/</a> | SASD FQ5<br><a href="https://www.sasdb.org/data/SASDFQ5/">https://www.sasdb.org/data/SASDFQ5/</a> | SASD FR5<br><a href="https://www.sasdb.org/data/SASDFR5/">https://www.sasdb.org/data/SASDFR5/</a> | SASD FS5<br><a href="https://www.sasdb.org/data/SASDFS5/">https://www.sasdb.org/data/SASDFS5/</a> | SASD FQ6<br><a href="https://www.sasdb.org/data/SASDFQ6/">https://www.sasdb.org/data/SASDFQ6/</a> | SASD GB3<br><a href="https://www.sasdb.org/data/SASDGB3/">https://www.sasdb.org/data/SASDGB3/</a> | SASD GC3<br><a href="https://www.sasdb.org/data/SASDGC3/">https://www.sasdb.org/data/SASDGC3/</a> | SASD GD3<br><a href="https://www.sasdb.org/data/SASDGD3/">https://www.sasdb.org/data/SASDGD3/</a> | SASD GE3<br><a href="https://www.sasdb.org/data/SASDGE3/">https://www.sasdb.org/data/SASDGE3/</a> |  |
| <b>Data Collection</b>                                            |                                                                                                   |                                                                                                   |                                                                                                   |                                                                                                   |                                                                                                   |                                                                                                   |                                                                                                   |                                                                                                   |                                                                                                   |                                                                                                   |                                                                                                   |                                                                                                   |                                                                                                   |                                                                                                   |                                                                                                   |                                                                                                   |                                                                                                   |                                                                                                   |                                                                                                   |                                                                                                   |                                                                                                   |                                                                                                   |                                                                                                   |  |
| Beamline                                                          | SIBYLS<br>beamline 12.3.1                                                                         |                                                                                                   |                                                                                                   |                                                                                                   |                                                                                                   |                                                                                                   |                                                                                                   |                                                                                                   |                                                                                                   |                                                                                                   |                                                                                                   |                                                                                                   |                                                                                                   |                                                                                                   |                                                                                                   |                                                                                                   |                                                                                                   |                                                                                                   |                                                                                                   |                                                                                                   |                                                                                                   |                                                                                                   |                                                                                                   |  |
| Beam energy                                                       | 11keV                                                                                             |                                                                                                   |                                                                                                   |                                                                                                   |                                                                                                   |                                                                                                   |                                                                                                   |                                                                                                   |                                                                                                   |                                                                                                   |                                                                                                   |                                                                                                   |                                                                                                   |                                                                                                   |                                                                                                   |                                                                                                   |                                                                                                   |                                                                                                   |                                                                                                   |                                                                                                   |                                                                                                   |                                                                                                   |                                                                                                   |  |
| Wavelength (Å)                                                    | 1.03                                                                                              |                                                                                                   |                                                                                                   |                                                                                                   |                                                                                                   |                                                                                                   |                                                                                                   |                                                                                                   |                                                                                                   |                                                                                                   |                                                                                                   |                                                                                                   |                                                                                                   |                                                                                                   |                                                                                                   |                                                                                                   |                                                                                                   |                                                                                                   |                                                                                                   |                                                                                                   |                                                                                                   |                                                                                                   |                                                                                                   |  |
| Sample-detector distance (m)                                      | 1.5                                                                                               |                                                                                                   |                                                                                                   |                                                                                                   |                                                                                                   |                                                                                                   |                                                                                                   |                                                                                                   |                                                                                                   |                                                                                                   |                                                                                                   |                                                                                                   |                                                                                                   |                                                                                                   |                                                                                                   |                                                                                                   |                                                                                                   |                                                                                                   |                                                                                                   |                                                                                                   |                                                                                                   |                                                                                                   |                                                                                                   |  |
| Detector                                                          | Pilatus 2M                                                                                        |                                                                                                   |                                                                                                   |                                                                                                   |                                                                                                   |                                                                                                   |                                                                                                   |                                                                                                   |                                                                                                   |                                                                                                   |                                                                                                   |                                                                                                   |                                                                                                   |                                                                                                   |                                                                                                   |                                                                                                   |                                                                                                   |                                                                                                   |                                                                                                   |                                                                                                   |                                                                                                   |                                                                                                   |                                                                                                   |  |
| Exposure time (s)                                                 | 3s                                                                                                | 3s                                                                                                | 3s                                                                                                | 3s                                                                                                | 3s                                                                                                | 3s                                                                                                | 3s                                                                                                | 3s                                                                                                | 3s                                                                                                | 3s                                                                                                | 3s                                                                                                | 3s                                                                                                | 3s                                                                                                | 3s                                                                                                | 3s                                                                                                | 3s                                                                                                | 3s                                                                                                | 3s                                                                                                | 10s/0.1s                                                                                          | 10s/0.1s                                                                                          | 10s/0.1s                                                                                          | 10s/0.1s                                                                                          | 10s/0.1s                                                                                          |  |
| HU concentration (mg/ml)                                          |                                                                                                   |                                                                                                   |                                                                                                   |                                                                                                   |                                                                                                   |                                                                                                   |                                                                                                   |                                                                                                   |                                                                                                   |                                                                                                   |                                                                                                   |                                                                                                   |                                                                                                   |                                                                                                   |                                                                                                   |                                                                                                   |                                                                                                   |                                                                                                   |                                                                                                   |                                                                                                   |                                                                                                   |                                                                                                   |                                                                                                   |  |
| q range (Å <sup>-1</sup> )                                        | 0.01-0.32                                                                                         |                                                                                                   |                                                                                                   |                                                                                                   |                                                                                                   |                                                                                                   |                                                                                                   |                                                                                                   |                                                                                                   |                                                                                                   |                                                                                                   |                                                                                                   |                                                                                                   |                                                                                                   |                                                                                                   |                                                                                                   |                                                                                                   |                                                                                                   |                                                                                                   |                                                                                                   |                                                                                                   |                                                                                                   |                                                                                                   |  |
| Temperature (K)                                                   | 283                                                                                               |                                                                                                   |                                                                                                   |                                                                                                   |                                                                                                   |                                                                                                   |                                                                                                   |                                                                                                   |                                                                                                   |                                                                                                   |                                                                                                   |                                                                                                   |                                                                                                   |                                                                                                   |                                                                                                   |                                                                                                   |                                                                                                   |                                                                                                   |                                                                                                   |                                                                                                   |                                                                                                   |                                                                                                   |                                                                                                   |  |
| Structural Parameters                                             |                                                                                                   |                                                                                                   |                                                                                                   |                                                                                                   |                                                                                                   |                                                                                                   |                                                                                                   |                                                                                                   |                                                                                                   |                                                                                                   |                                                                                                   |                                                                                                   |                                                                                                   |                                                                                                   |                                                                                                   |                                                                                                   |                                                                                                   |                                                                                                   |                                                                                                   |                                                                                                   |                                                                                                   |                                                                                                   |                                                                                                   |  |
| I(0) (real) (cm <sup>-1</sup> )                                   | 9.3                                                                                               | 785                                                                                               | N/A                                                                                               | N/A                                                                                               | N/A                                                                                               | 263                                                                                               | N/A                                                                                               | N/A                                                                                               | N/A                                                                                               | 158                                                                                               | N/A                                                                                               | 91                                                                                                | 72                                                                                                | 89                                                                                                | 94                                                                                                | 94                                                                                                | 103                                                                                               | 106                                                                                               | 442                                                                                               | N/A                                                                                               | N/A                                                                                               | 262                                                                                               | 383                                                                                               |  |
| R <sub>g</sub> (real) (Å)                                         | 29                                                                                                | 69                                                                                                | N/A                                                                                               | N/A                                                                                               | N/A                                                                                               | 87                                                                                                | N/A                                                                                               | N/A                                                                                               | N/A                                                                                               | 69                                                                                                | N/A                                                                                               | 70                                                                                                | 74                                                                                                | 70                                                                                                | 92                                                                                                | 69                                                                                                | 66                                                                                                | 71                                                                                                | 22                                                                                                | N/A                                                                                               | N/A                                                                                               | 78                                                                                                | 75                                                                                                |  |
| I(0) (reciprocal) (cm <sup>-1</sup> )                             | 7.5                                                                                               | 733                                                                                               | N/A                                                                                               | N/A                                                                                               | N/A                                                                                               | 264                                                                                               | N/A                                                                                               | N/A                                                                                               | N/A                                                                                               | 154                                                                                               | N/A                                                                                               | 86                                                                                                | 72                                                                                                | 83                                                                                                | 102                                                                                               | 93                                                                                                | 92                                                                                                | 99                                                                                                | 450                                                                                               | N/A                                                                                               | N/A                                                                                               | 262                                                                                               | 391                                                                                               |  |
| R <sub>g</sub> (reciprocal) (Å)                                   | 30                                                                                                | 77                                                                                                | N/A                                                                                               | N/A                                                                                               | N/A                                                                                               | 59                                                                                                | N/A                                                                                               | N/A                                                                                               | N/A                                                                                               | 64                                                                                                | N/A                                                                                               | 62                                                                                                | 69                                                                                                | 60                                                                                                | 89                                                                                                | 65                                                                                                | 59                                                                                                | 63                                                                                                | 22                                                                                                | N/A                                                                                               | N/A                                                                                               | 73                                                                                                | 71                                                                                                |  |
| Cross sectional radius R <sub>c</sub> (Å)                         | N/A                                                                                               | 10.7                                                                                              | N/A                                                                                               | N/A                                                                                               | N/A                                                                                               | 19.5                                                                                              | N/A                                                                                               | N/A                                                                                               | N/A                                                                                               | 20.9                                                                                              | N/A                                                                                               | 21.1                                                                                              | 21.9                                                                                              | 18.5                                                                                              | 22                                                                                                | 21.5                                                                                              | 20.7                                                                                              | 19                                                                                                | N/A                                                                                               | N/A                                                                                               | N/A                                                                                               | 21.4                                                                                              | 20.8                                                                                              |  |
| D <sub>max</sub> (Å) <sub>a</sub>                                 | 106                                                                                               | 290                                                                                               | N/A                                                                                               | N/A                                                                                               | N/A                                                                                               | 274                                                                                               | N/A                                                                                               | N/A                                                                                               | N/A                                                                                               | 250                                                                                               | N/A                                                                                               | 244                                                                                               | 250                                                                                               | 285                                                                                               | 287                                                                                               | 247                                                                                               | 241                                                                                               | 240                                                                                               | 67                                                                                                | N/A                                                                                               | N/A                                                                                               | 280                                                                                               | 275                                                                                               |  |
| Porod Volume (Å <sup>3</sup> )                                    | 68                                                                                                | 238                                                                                               | N/A                                                                                               | N/A                                                                                               | N/A                                                                                               | 383                                                                                               | N/A                                                                                               | N/A                                                                                               | N/A                                                                                               | 268                                                                                               | N/A                                                                                               | 274                                                                                               | 352                                                                                               | 218                                                                                               | 410                                                                                               | 336                                                                                               | 308                                                                                               | 242                                                                                               | 36                                                                                                | N/A                                                                                               | N/A                                                                                               | 330                                                                                               | 309                                                                                               |  |
| Calculated monomeric M <sub>r</sub> from sequence (kDa)           | 19                                                                                                | 56                                                                                                | 19/56                                                                                             | 19/56                                                                                             | 19/56                                                                                             | 19/56                                                                                             | 19/56                                                                                             | 19/56                                                                                             | 19/56                                                                                             | 19/56                                                                                             | 19/56                                                                                             | 19/56                                                                                             | 19/56                                                                                             | 19/56                                                                                             | 19/56                                                                                             | 19/56                                                                                             | 19/56                                                                                             | 19/56                                                                                             | 19                                                                                                | 19/56                                                                                             | 19/56                                                                                             | 19/56                                                                                             | 19/56                                                                                             |  |
| Molecular weight <sub>b</sub>                                     | 37                                                                                                | 59                                                                                                | N/A                                                                                               | N/A                                                                                               | N/A                                                                                               | 300                                                                                               | N/A                                                                                               | N/A                                                                                               | N/A                                                                                               | 230                                                                                               | N/A                                                                                               | 220                                                                                               | 300                                                                                               | 190                                                                                               | 360                                                                                               | 260                                                                                               | 260                                                                                               | 190                                                                                               | 20                                                                                                | 65                                                                                                | 69                                                                                                | 157                                                                                               | 157                                                                                               |  |
| <b>Software</b>                                                   |                                                                                                   |                                                                                                   |                                                                                                   |                                                                                                   |                                                                                                   |                                                                                                   |                                                                                                   |                                                                                                   |                                                                                                   |                                                                                                   |                                                                                                   |                                                                                                   |                                                                                                   |                                                                                                   |                                                                                                   |                                                                                                   |                                                                                                   |                                                                                                   |                                                                                                   |                                                                                                   |                                                                                                   |                                                                                                   |                                                                                                   |  |
| Primary data reduction                                            | SCÅTTER                                                                                           |                                                                                                   |                                                                                                   |                                                                                                   |                                                                                                   |                                                                                                   |                                                                                                   |                                                                                                   |                                                                                                   |                                                                                                   |                                                                                                   |                                                                                                   |                                                                                                   |                                                                                                   |                                                                                                   |                                                                                                   |                                                                                                   |                                                                                                   |                                                                                                   |                                                                                                   |                                                                                                   |                                                                                                   |                                                                                                   |  |
| Data processing                                                   | Gnom / Scåtter                                                                                    | Gnom / Scåtter                                                                                    | SAS View                                                                                          | SAS View                                                                                          | SAS View                                                                                          | Gnom/ Scåtter                                                                                     | SAS View                                                                                          | SAS View                                                                                          | SAS View                                                                                          | Gnom/ Scåtter                                                                                     | SAS View                                                                                          | Gnom/ Scåtter                                                                                     | Gnom/ Scåtter                                                                                     | Gnom/ Scåtter                                                                                     | Gnom/ Scåtter                                                                                     | Gnom/ Scåtter                                                                                     | Gnom/ Scåtter                                                                                     | Gnom/ Scåtter                                                                                     | Gnom/ Scåtter                                                                                     | Gnom/ Scåtter                                                                                     | Gnom/ Scåtter                                                                                     | Gnom/ Scåtter                                                                                     | Gnom/ Scåtter                                                                                     |  |
| Rigid body modelling                                              | FoXS/ Multi FoXS                                                                                  | FoXS                                                                                              | N/A                                                                                               | N/A                                                                                               | N/A                                                                                               | N/A                                                                                               | N/A                                                                                               | N/A                                                                                               | N/A                                                                                               | FoXS                                                                                              | N/A                                                                                               | FoXS                                                                                              | FoXS                                                                                              | FoXS                                                                                              | FoXS                                                                                              | FoXS                                                                                              | FoXS                                                                                              | FoXS                                                                                              | FoXS                                                                                              | N/A                                                                                               | N/A                                                                                               | FoXS                                                                                              | FoXS                                                                                              |  |
| χ <sup>2</sup>                                                    | 10.5                                                                                              | 129                                                                                               |                                                                                                   |                                                                                                   |                                                                                                   |                                                                                                   |                                                                                                   |                                                                                                   |                                                                                                   | 14.7                                                                                              |                                                                                                   | 4.9                                                                                               | 3.2                                                                                               | 4.4                                                                                               | 3.5                                                                                               | 4.6                                                                                               | 2.4                                                                                               | 7.6                                                                                               | 4.0                                                                                               |                                                                                                   |                                                                                                   | 3.8                                                                                               | 4.3                                                                                               |  |
| 3D graphics representations                                       | CHIMERA                                                                                           |                                                                                                   |                                                                                                   |                                                                                                   |                                                                                                   |                                                                                                   |                                                                                                   |                                                                                                   |                                                                                                   |                                                                                                   |                                                                                                   |                                                                                                   |                                                                                                   |                                                                                                   |                                                                                                   |                                                                                                   |                                                                                                   |                                                                                                   |                                                                                                   |                                                                                                   |                                                                                                   |                                                                                                   |                                                                                                   |  |
| <sub>a</sub> D <sub>max</sub> is defined by P(r) function         |                                                                                                   |                                                                                                   |                                                                                                   |                                                                                                   |                                                                                                   |                                                                                                   |                                                                                                   |                                                                                                   |                                                                                                   |                                                                                                   |                                                                                                   |                                                                                                   |                                                                                                   |                                                                                                   |                                                                                                   |                                                                                                   |                                                                                                   |                                                                                                   |                                                                                                   |                                                                                                   |                                                                                                   |                                                                                                   |                                                                                                   |  |
| <sub>b</sub> MW estimation calculated using Volume of Correlation |                                                                                                   |                                                                                                   |                                                                                                   |                                                                                                   |                                                                                                   |                                                                                                   |                                                                                                   |                                                                                                   |                                                                                                   |                                                                                                   |                                                                                                   |                                                                                                   |                                                                                                   |                                                                                                   |                                                                                                   |                                                                                                   |                                                                                                   |                                                                                                   |                                                                                                   |                                                                                                   |                                                                                                   |                                                                                                   |                                                                                                   |  |

**Supplementary Table 2. SAXS data collection and analysis parameters (Related Figure 4 and Supplementary Figures 2 and 3)**

**Supplementary Table 3. Lamellar stack Caille function model parameters (Related Figure 4 and Supplementary Figure 2)**

|                                                                  | Bilayer thickness | Number of layers | d-spacing | Caille parameter | Polydispersity/PD [ratio] |                           |
|------------------------------------------------------------------|-------------------|------------------|-----------|------------------|---------------------------|---------------------------|
|                                                                  |                   |                  |           |                  | Distribution of thickness | Distribution of d-spacing |
| <b>HU<math>\alpha</math> 80bp DNA<br/>pH 4.5, 50mM<br/>NaCl</b>  | 34.88             | 14.0             | 42.36     | 0.27             | 0.141                     | 0.136                     |
| <b>HU<math>\alpha</math> 80bp DNA<br/>pH 4.5, 100mM<br/>NaCl</b> | 35.86             | 30               | 41.34     | 0.34             | 0.142                     | 0.123                     |
| <b>HU<math>\alpha</math> 80bp DNA<br/>pH 4.5, 150mM<br/>NaCl</b> | 40                | 75               | 43.76     | 0.25             | 0.098                     | 0.04                      |
| <b>HU<math>\alpha</math> 80bp DNA<br/>pH 5.5, 50mM<br/>NaCl</b>  | 31.32             | 15               | 58.00     | 0.52             | 0.00                      | 0.15                      |
| <b>HU<math>\alpha</math> 80bp DNA<br/>pH 5.5, 100mM<br/>NaCl</b> | 35                | 25               | 70.00     | 0.15             | 0.00                      | 0.03                      |
| <b>HU<math>\alpha</math> 80bp DNA<br/>pH 5.5, 150mM<br/>NaCl</b> | 36.32             | 24               | 44.25     | 0.38             | 0.007                     | 0.052                     |
| <b>HU<math>\alpha</math> 80bp DNA<br/>pH 6.5, 50mM<br/>NaCl</b>  | 35.35             | 8                | 62        | 0.55             | 0.15                      | 0.15                      |
